# Supplementary material
Source: PubMed Central journal article supplement (PMC3433045)
Supplement: NIHMS398034-supplement-Supplemental.pdf [file NIHMS398034-supplement-Supplemental.pdf]

## **Supplementary Methods- Bioinformatic Analyses**

### Significance Analysis of Microarrays (SAM)

SAM is a stringent bioinformatic analysis that uses specified fold change and false discovery rate (FDR) cutoffs, non-parametric statistics with repeated permutations of the data, and corrections for multiple comparisons to determine the significance of individual gene transcripts. The normalized microarray data were analyzed using SAM 3.0 software (Tusher et al. 2001) to derive a refined list of genes affected by IFN-alpha, or to identify those genes significantly different between subjects with low versus high MADRS ( $\geq 15$ ) and MFI ( $\geq 75$ ) scores. Differentially expressed genes were identified using a 1.5-fold cutoff and a less than 1% FDR with 500 permutations of the data.

### Ingenuity Pathways Analysis (IPA)

Differentially regulated genes as identified by SAM were subsequently analyzed for cellular functions and pathways as well as imputed associations with medical illnesses using IPA (Ingenuity Systems, Redwood City, CA), and these results were used to determine genes for validation by RT-PCR. IPA evaluates changes in gene expression as they relates to known pathways associated with a variety of cellular functions and disease states.

### Transcription Element Listening System (TELiS)

Activity of upstream signal transduction pathways were analyzed by TELiS ([www.telis.ucla.edu](http://www.telis.ucla.edu)) (Cole et al. 2005). The TELiS database contains information on the prevalence of transcription factor binding motifs (TFBMs) in the promoters of all human, mouse, and rat genes, and is used to determine the representation of TFBMs in the promoter regions of differentially expressed genes. Promoters are strings of 300, 600, or 1200 nucleotides upstream of each gene's transcription start site, as indicated in the NCBI RefSeq database. TFBMs are defined by 108 position-specific weight matrices from the JASPAR 2 database, or 192 matrices representing all

vertebrate transcription factors in the TRANSFAC database. Binding motifs are detected by the MatInspector algorithm. This study surveyed the TRANSFAC and JASPAR databases to assess TFBMs associated with IFN-alpha, CREB/ATF, and AP1/c-Fos signaling, as well as myeloid differentiation (see Table 2 of the manuscript for specific matrices).

TELiS and TOA analyses provide the most accurate results when focused on relatively large numbers of genes showing large biological differences in expression. Therefore, we used a slightly less stringent FDR of 5% to identify a larger list of initial “driver genes” for these second-stage bioinformatic analyses, and relied on the second stage of statistical testing at the level of specific TFBMs and/or candidate cell types of origin, to ensure statistical reliability (Bower et al. 2011; Cole et al. 2003; Miller et al. 2008). The comprehensive lists were subsequently subject to the stringency of statistical analysis by TELiS, in conjunction with the PromoterStats statistical tool, to identify transcription factors driving gene expression dynamics. This study employed a 2-sample variant of the TELiS, comparing up- and down-regulated gene lists from the same sample/cell type, which removes biases that may arise from comparing to the entire genome. Aggregate results were pooled across 9 different technical specifications involving variations of promoter length (-300, -600, and -1000 to +200 base pairs relative to the RefSeq gene transcription start site) and TFBM match stringency (mat\_sim .80, .90, .95), for both the TRANSFAC and JASPAR databases. P values were calculated using dependent-sample t tests (Miller 1986).

#### Transcript origin analysis (TOA)

Transcript origin analysis (Cole et al. 2011) was applied to identify the cellular source of differentially expressed genes. This analysis identified the cell types responsible for the pattern of differentially expressed genes observed. Some genes are more commonly expressed in one immune cell type compared to others, as established by a reference data set, and this analysis

determines whether these genes are significantly over or under represented in a list of differentially regulated transcripts. Therefore, this analysis determines the cell types that are transcriptionally sensitive to a particular manipulation (e.g. IFN-alpha administration) or behavioral or physiological state (e.g. depression/fatigue).

The TOA tests whether differentially expressed genes originated predominately from one or more of the major leukocyte subtypes (monocyte, plasmacytoid dendritic cell, CD4+ T cell, CD8+ T cell, B cell, NK cell). It quantifies a cell type diagnosticity score,  $Scg$ , based on reference data from physically isolated leukocyte subsets in the publicly available Human Gene Atlas, which can be found at [Gene Expression Omnibus (GEO) series GSE1133; <http://www.ncbi.nlm.nih.gov/projects/geo/query/acc.cgi?acc=GSE1133>]. Average cell-specific diagnosticity scores for differentially expressed genes were tested for enrichment relative to the genome-wide (null hypothesis) average score using a single-sample t-test. Similar results were obtained using log transformed diagnosticity scores (data not shown).

**Supplemental Table 1.** Gene transcripts significantly up- and down-regulated in subjects administered 12 weeks IFN-alpha and ribavirin (n=11) compared to controls (n=10) as identified by SAM.

| Up-regulated Genes |              |                |             |          |             |
|--------------------|--------------|----------------|-------------|----------|-------------|
| Symbol             | Probe ID     | Accession      | Fold change | p-value  | q-value (%) |
| IFI27              | ILMN_2058782 | NM_005532.3    | 173.71      | 6.15E-10 | 0           |
| OTOF               | ILMN_1663347 | NM_194323.1    | 25.08       | 8.13E-04 | 0.00        |
| IFIT1              | ILMN_1707695 | NM_001548.3    | 10.76       | 7.87E-06 | 0.00        |
| IFI44L             | ILMN_1723912 | NM_006820.1    | 10.31       | 5.90E-08 | 0.00        |
| IFIT3              | ILMN_2239754 | NM_001549.2    | 8.53        | 1.53E-06 | 0.00        |
| IFIT3              | ILMN_1701789 | NM_001031683.1 | 7.96        | 6.43E-06 | 0.00        |
| IFI6               | ILMN_2347798 | NM_022872.2    | 7.90        | 1.21E-05 | 0.00        |
| RSAD2              | ILMN_1657871 | NM_080657.4    | 6.91        | 2.43E-05 | 0.00        |
| IFITM3             | ILMN_1805750 | NM_021034.2    | 6.64        | 1.69E-09 | 0.00        |
| CCL2               | ILMN_1720048 | NM_002982.3    | 5.74        | 1.24E-04 | 0.00        |
| LGALS3BP           | ILMN_1659688 | NM_005567.2    | 5.56        | 2.47E-05 | 0.00        |
| ISG15              | ILMN_2054019 | NM_005101.1    | 5.00        | 7.31E-04 | 0.00        |
| IFIT3              | ILMN_1664543 | NM_001031683.1 | 4.98        | 2.25E-07 | 0.00        |
| HERC5              | ILMN_1729749 | NM_016323.2    | 4.87        | 4.95E-06 | 0.00        |
| IFI44              | ILMN_1760062 | NM_006417.3    | 4.77        | 2.95E-07 | 0.00        |
| MX1                | ILMN_1662358 | NM_002462.2    | 4.74        | 1.68E-06 | 0.00        |
| OASL               | ILMN_1674811 | NM_198213.1    | 4.66        | 2.49E-05 | 0.00        |
| IFIT2              | ILMN_1739428 | NM_001547.4    | 4.52        | 5.34E-05 | 0.00        |
| HESX1              | ILMN_1742929 | NM_003865.1    | 4.52        | 4.26E-04 | 0.00        |
| OAS3               | ILMN_1745397 | NM_006187.2    | 4.49        | 2.47E-06 | 0.00        |
| C1QB               | ILMN_1796409 | NM_000491.3    | 4.42        | 1.46E-02 | 0.41        |
| EPSTI1             | ILMN_2388547 | NM_033255.2    | 4.40        | 2.66E-09 | 0.00        |
| LOC26010           | ILMN_1683678 | NM_001100422.1 | 4.27        | 1.15E-06 | 0.00        |
| LY6E               | ILMN_1695404 | NM_002346.1    | 4.10        | 3.80E-09 | 0.00        |
|                    | ILMN_1835092 | BQ437417       | 4.04        | 7.99E-07 | 0.00        |
| HERC6              | ILMN_1654639 | NM_017912.3    | 4.04        | 7.31E-06 | 0.00        |
| OAS1               | ILMN_2410826 | NM_001032409.1 | 4.03        | 9.96E-08 | 0.00        |
| MX2                | ILMN_2231928 | NM_002463.1    | 3.81        | 5.63E-07 | 0.00        |
| XAF1               | ILMN_1742618 | NM_199139.1    | 3.71        | 4.58E-06 | 0.00        |
| CMPK2              | ILMN_1783621 | NM_207315.2    | 3.71        | 1.02E-06 | 0.00        |
| OAS2               | ILMN_1674063 | NM_016817.2    | 3.70        | 4.15E-07 | 0.00        |
| OAS1               | ILMN_1675640 | NM_001032409.1 | 3.60        | 1.30E-07 | 0.00        |
| OAS2               | ILMN_1736729 | NM_002535.2    | 3.54        | 9.59E-08 | 0.00        |
| DEFB1              | ILMN_1686573 | NM_005218.3    | 3.52        | 1.49E-03 | 0.00        |
| OASL               | ILMN_1681721 | NM_003733.2    | 3.49        | 1.41E-05 | 0.00        |
| HBA2               | ILMN_2127842 | NM_000517.3    | 3.40        | 7.05E-05 | 0.00        |
| OAS1               | ILMN_1658247 | NM_002534.2    | 3.31        | 2.25E-02 | 0.80        |
| JUP                | ILMN_1733811 | NM_002230.1    | 3.27        | 4.17E-05 | 0.00        |
| XAF1               | ILMN_2370573 | NM_199139.1    | 3.27        | 8.72E-05 | 0.00        |
| IRF7               | ILMN_1798181 | NM_004029.2    | 3.26        | 1.34E-07 | 0.00        |
| C1QC               | ILMN_1785902 | NM_172369.2    | 3.26        | 2.53E-03 | 0.00        |
| SIGLEC1            | ILMN_1725320 | NM_023068.3    | 3.25        | 2.77E-06 | 0.00        |
| IRF7               | ILMN_2349061 | NM_004029.2    | 3.25        | 2.99E-07 | 0.00        |

|           |              |                |      |          |      |
|-----------|--------------|----------------|------|----------|------|
| CCL8      | ILMN_1772964 | NM_005623.2    | 3.16 | 5.28E-03 | 0.21 |
| IFITM2    | ILMN_1673352 | NM_006435.2    | 3.14 | 3.92E-09 | 0.00 |
| SERPING1  | ILMN_1670305 | NM_001032295.1 | 3.07 | 9.74E-04 | 0.00 |
| PARP9     | ILMN_1731224 | NM_031458.1    | 3.06 | 7.81E-08 | 0.00 |
| DDX60     | ILMN_1795181 | NM_017631.4    | 3.04 | 7.80E-07 | 0.00 |
| CTSL1     | ILMN_2374036 | NM_145918.2    | 3.01 | 1.10E-05 | 0.00 |
| CTSL1     | ILMN_1812995 | NM_001912.3    | 3.00 | 2.86E-05 | 0.00 |
| HES4      | ILMN_1653466 | NM_021170.2    | 3.00 | 3.32E-04 | 0.00 |
| RNASE2    | ILMN_1730628 | NM_002934.2    | 2.99 | 1.64E-06 | 0.00 |
| EIF2AK2   | ILMN_1706502 | NM_002759.1    | 2.98 | 4.74E-06 | 0.00 |
| AXL       | ILMN_2364521 | NM_021913.2    | 2.95 | 1.62E-04 | 0.00 |
| PRIC285   | ILMN_1787509 | NM_033405.2    | 2.93 | 2.05E-05 | 0.00 |
| IFIT1     | ILMN_1699331 | NM_001548.2    | 2.91 | 9.11E-06 | 0.00 |
| LAMP3     | ILMN_2170814 | NM_014398.2    | 2.90 | 6.53E-05 | 0.00 |
| PLSCR1    | ILMN_1745242 | NM_021105.1    | 2.89 | 1.90E-06 | 0.00 |
|           | ILMN_1910908 | BG205162       | 2.88 | 7.94E-07 | 0.00 |
| IFIH1     | ILMN_1781373 | NM_022168.2    | 2.82 | 4.89E-07 | 0.00 |
| AXL       | ILMN_1701877 | NM_021913.2    | 2.82 | 1.97E-04 | 0.00 |
| IFI35     | ILMN_1745374 | NM_005533.2    | 2.76 | 2.59E-06 | 0.00 |
| MT2A      | ILMN_1686664 | NM_005953.2    | 2.68 | 1.63E-06 | 0.00 |
| NEXN      | ILMN_1783276 | NM_144573.3    | 2.66 | 2.69E-04 | 0.00 |
| TCN2      | ILMN_1740572 | NM_000355.2    | 2.63 | 3.80E-04 | 0.00 |
| OAS2      | ILMN_1709333 | NM_016817.2    | 2.61 | 2.81E-07 | 0.00 |
| RGL1      | ILMN_1654398 | NM_015149.3    | 2.60 | 8.24E-05 | 0.00 |
| TMEM51    | ILMN_1674985 | NM_018022.1    | 2.56 | 6.56E-04 | 0.00 |
| SAMD9L    | ILMN_1799467 | NM_152703.2    | 2.53 | 8.31E-05 | 0.00 |
| FCGR1B    | ILMN_2261600 | NM_001017986.1 | 2.53 | 2.40E-03 | 0.00 |
| APOBEC3A  | ILMN_1680192 | NM_145699.2    | 2.52 | 2.89E-04 | 0.00 |
| ZBP1      | ILMN_1765994 | NM_030776.1    | 2.51 | 2.00E-05 | 0.00 |
| IL8RBP    | ILMN_1691507 | XR_001023.1    | 2.51 | 4.02E-05 | 0.00 |
| USP41     | ILMN_1690365 | XM_036729.5    | 2.50 | 7.25E-06 | 0.00 |
| IFITM1    | ILMN_1801246 | NM_003641.3    | 2.47 | 9.16E-06 | 0.00 |
| SAMD4A    | ILMN_2119297 | NM_015589.3    | 2.45 | 1.61E-05 | 0.00 |
| KCTD14    | ILMN_1731044 | NM_023930.3    | 2.42 | 2.07E-04 | 0.00 |
| IL1F7     | ILMN_1697710 | NM_014439.3    | 2.41 | 7.09E-06 | 0.00 |
| DHX58     | ILMN_1678422 | NM_024119.2    | 2.41 | 2.28E-05 | 0.00 |
| GMPR      | ILMN_1729487 | NM_006877.2    | 2.38 | 8.49E-04 | 0.00 |
| H1FO      | ILMN_1757467 | NM_005318.2    | 2.37 | 7.05E-05 | 0.00 |
| FFAR2     | ILMN_1797895 | NM_005306.1    | 2.36 | 3.49E-04 | 0.00 |
| CXCL10    | ILMN_1791759 | NM_001565.2    | 2.34 | 6.11E-03 | 0.21 |
| HBA2      | ILMN_1667796 | NM_000517.3    | 2.34 | 3.24E-03 | 0.00 |
| SAMD9     | ILMN_1814305 | NM_017654.2    | 2.31 | 2.30E-05 | 0.00 |
| SCO2      | ILMN_1701621 | NM_005138.1    | 2.30 | 7.41E-05 | 0.00 |
| STAT1     | ILMN_1690105 | NM_007315.2    | 2.29 | 1.40E-05 | 0.00 |
| E2F2      | ILMN_1777233 | NM_004091.2    | 2.27 | 2.58E-04 | 0.00 |
| STAT1     | ILMN_1691364 | NM_139266.1    | 2.25 | 9.78E-05 | 0.00 |
| EMP1      | ILMN_1801616 | NM_001423.1    | 2.25 | 1.33E-05 | 0.00 |
| CCR1      | ILMN_1678833 | NM_001295.2    | 2.22 | 4.51E-06 | 0.00 |
| LOC728216 | ILMN_1740200 | XM_001128283.1 | 2.22 | 1.36E-05 | 0.00 |

|           |              |                |      |          |      |
|-----------|--------------|----------------|------|----------|------|
| ECGF1     | ILMN_1690939 | NM_001953.2    | 2.19 | 1.05E-04 | 0.00 |
| HBB       | ILMN_2100437 | NM_000518.4    | 2.18 | 4.08E-03 | 0.21 |
| GBP1      | ILMN_1701114 | NM_002053.1    | 2.17 | 7.26E-04 | 0.00 |
| ENDOGL1   | ILMN_1709747 | NM_005107.2    | 2.16 | 1.35E-05 | 0.00 |
| LGALS9    | ILMN_2412214 | NM_009587.2    | 2.15 | 4.87E-08 | 0.00 |
| OAS2      | ILMN_2248970 | NM_001032731.1 | 2.14 | 2.51E-04 | 0.00 |
| TNFSF10   | ILMN_1801307 | NM_003810.2    | 2.14 | 1.62E-05 | 0.00 |
| PLAC8     | ILMN_1653026 | NM_016619.1    | 2.13 | 1.86E-05 | 0.00 |
| PARP12    | ILMN_1718558 | NM_022750.2    | 2.13 | 2.33E-05 | 0.00 |
| BLVRA     | ILMN_1691436 | NM_000712.3    | 2.11 | 1.98E-06 | 0.00 |
| MT1A      | ILMN_1691156 | NM_005946.2    | 2.11 | 4.32E-06 | 0.00 |
| RTP4      | ILMN_2173975 | NM_022147.2    | 2.09 | 9.40E-06 | 0.00 |
| LILRA3    | ILMN_1786303 | NM_006865.2    | 2.08 | 4.17E-03 | 0.00 |
| HSH2D     | ILMN_1788017 | NM_032855.2    | 2.07 | 1.02E-05 | 0.00 |
| PARP9     | ILMN_2053527 | NM_031458.1    | 2.07 | 1.24E-07 | 0.00 |
| STAT1     | ILMN_1777325 | NM_007315.2    | 2.04 | 1.23E-07 | 0.00 |
| GBP1      | ILMN_2148785 | NM_002053.1    | 2.01 | 7.26E-04 | 0.00 |
| TRIM22    | ILMN_1779252 | NM_006074.3    | 2.01 | 2.31E-05 | 0.00 |
| C3AR1     | ILMN_1787529 | NM_004054.2    | 2.01 | 2.06E-04 | 0.00 |
| KIAA1618  | ILMN_2289093 | NM_020954.2    | 1.99 | 3.69E-04 | 0.00 |
| RNASE1    | ILMN_2333670 | NM_198235.1    | 1.99 | 6.30E-03 | 0.21 |
| PLAC8     | ILMN_2093343 | NM_016619.1    | 1.98 | 5.93E-06 | 0.00 |
| NT5C3     | ILMN_1769734 | NM_001002010.1 | 1.98 | 4.64E-04 | 0.00 |
| RNASE3    | ILMN_2113126 | NM_002935.2    | 1.98 | 9.30E-05 | 0.00 |
| MS4A4A    | ILMN_2370336 | NM_148975.1    | 1.96 | 3.11E-05 | 0.00 |
| LAP3      | ILMN_1683792 | NM_015907.2    | 1.95 | 3.97E-04 | 0.00 |
| CD38      | ILMN_2233783 | NM_001775.2    | 1.95 | 3.11E-05 | 0.00 |
| NCOA7     | ILMN_1687768 | NM_181782.2    | 1.94 | 4.87E-05 | 0.00 |
| SP110     | ILMN_2415144 | NM_004510.2    | 1.93 | 3.36E-08 | 0.00 |
| FBXO6     | ILMN_1701455 | NM_018438.4    | 1.93 | 5.12E-05 | 0.00 |
| FCGR1A    | ILMN_2176063 | NM_000566.2    | 1.93 | 7.17E-03 | 0.21 |
| DDX58     | ILMN_1797001 | NM_014314.3    | 1.93 | 7.32E-05 | 0.00 |
| FCGR1B    | ILMN_2391051 | NM_001004340.1 | 1.92 | 1.59E-02 | 0.41 |
| LGALS9    | ILMN_1715760 | NM_009587.2    | 1.92 | 4.57E-05 | 0.00 |
| MARCKS    | ILMN_1807042 | NM_002356.5    | 1.90 | 4.73E-06 | 0.00 |
| CHMP5     | ILMN_1732534 | NM_016410.3    | 1.90 | 1.04E-06 | 0.00 |
| SP110     | ILMN_1731418 | NM_004510.2    | 1.88 | 1.76E-07 | 0.00 |
| LILRA3    | ILMN_1661631 | NM_006865.2    | 1.88 | 8.11E-03 | 0.21 |
| ECGF1     | ILMN_2109708 | NM_001953.2    | 1.87 | 3.72E-05 | 0.00 |
| TRIM5     | ILMN_1704972 | NM_033034.1    | 1.87 | 1.48E-05 | 0.00 |
| ACP2      | ILMN_2104830 | NM_001610.1    | 1.87 | 8.53E-07 | 0.00 |
| LOC654346 | ILMN_1766184 | XM_934665.1    | 1.86 | 1.41E-06 | 0.00 |
| PRKCDBP   | ILMN_1793476 | NM_145040.2    | 1.86 | 8.12E-03 | 0.21 |
| ISG20     | ILMN_1659913 | NM_002201.4    | 1.86 | 6.37E-05 | 0.00 |
| LOC649143 | ILMN_1815895 | XM_944822.1    | 1.85 | 2.04E-02 | 0.61 |
| MARCO     | ILMN_1731503 | NM_006770.3    | 1.85 | 3.14E-03 | 0.00 |
| C2        | ILMN_1710740 | NM_000063.3    | 1.84 | 2.36E-03 | 0.00 |
| RRAS      | ILMN_1780825 | NM_006270.3    | 1.83 | 3.42E-05 | 0.00 |
| C1QA      | ILMN_1737918 | NM_015991.1    | 1.82 | 1.74E-02 | 0.80 |

|          |              |                |      |          |      |
|----------|--------------|----------------|------|----------|------|
| CHMP5    | ILMN_2094166 | NM_016410.2    | 1.80 | 1.77E-07 | 0.00 |
| CASP5    | ILMN_1722158 | NM_004347.1    | 1.80 | 4.77E-03 | 0.21 |
| TOR1B    | ILMN_1724333 | NM_014506.1    | 1.80 | 1.13E-04 | 0.00 |
| ADAR     | ILMN_2320964 | NM_015840.2    | 1.80 | 2.41E-08 | 0.00 |
| MT1E     | ILMN_2173611 | NM_175617.3    | 1.80 | 9.26E-06 | 0.00 |
| TLR7     | ILMN_1677827 | NM_016562.3    | 1.79 | 2.39E-04 | 0.00 |
| LILRB4   | ILMN_2355953 | NM_001081438.1 | 1.77 | 7.01E-05 | 0.00 |
| GRN      | ILMN_1724250 | NM_002087.2    | 1.77 | 6.86E-06 | 0.00 |
| TRIP6    | ILMN_1713990 | NM_003302.2    | 1.76 | 7.59E-06 | 0.00 |
| FPR3     | ILMN_2203271 | NM_002030.3    | 1.76 | 3.04E-04 | 0.00 |
| IFI30    | ILMN_1807277 | NM_006332.3    | 1.76 | 1.72E-03 | 0.00 |
| IFI16    | ILMN_1710937 | NM_005531.1    | 1.76 | 4.58E-06 | 0.00 |
| C5orf32  | ILMN_1761566 | NM_032412.3    | 1.76 | 2.54E-05 | 0.00 |
| NT5C3    | ILMN_2352121 | NM_001002010.1 | 1.75 | 3.55E-03 | 0.00 |
| LGALS9B  | ILMN_2113333 | NM_001042685.1 | 1.75 | 1.36E-05 | 0.00 |
| OAS1     | ILMN_1672606 | NM_016816.2    | 1.75 | 4.23E-06 | 0.00 |
| PPM1K    | ILMN_2070044 | NM_152542.2    | 1.75 | 2.62E-04 | 0.00 |
|          | ILMN_1845037 | BC031266       | 1.74 | 1.15E-07 | 0.00 |
| TDRD7    | ILMN_1705241 | NM_014290.1    | 1.74 | 3.86E-06 | 0.00 |
| UBE2L6   | ILMN_1769520 | NM_004223.3    | 1.74 | 1.21E-05 | 0.00 |
| SLC31A2  | ILMN_1758938 | NM_001860.2    | 1.74 | 3.20E-03 | 0.00 |
| MAFB     | ILMN_1764709 | NM_005461.3    | 1.73 | 1.64E-04 | 0.00 |
| ANXA2    | ILMN_1711899 | NM_001002857.1 | 1.72 | 3.11E-04 | 0.00 |
| BST2     | ILMN_1723480 | NM_004335.2    | 1.72 | 2.82E-05 | 0.00 |
| RNF213   | ILMN_1749722 | NM_020914.3    | 1.72 | 1.24E-02 | 0.41 |
| TNFSF13B | ILMN_1758418 | NM_006573.3    | 1.71 | 3.49E-04 | 0.00 |
| ADAR     | ILMN_1776777 | NM_001111.3    | 1.70 | 4.25E-06 | 0.00 |
| GBP4     | ILMN_1771385 | NM_052941.3    | 1.69 | 1.02E-03 | 0.00 |
| FPR2     | ILMN_1740875 | NM_001005738.1 | 1.69 | 1.11E-04 | 0.00 |
| IL4I1    | ILMN_1659960 | NM_172374.1    | 1.68 | 5.01E-03 | 0.21 |
| LILRB2   | ILMN_1695744 | NM_001080978.1 | 1.67 | 7.14E-04 | 0.00 |
| PHF11    | ILMN_2390162 | NM_001040443.1 | 1.67 | 1.27E-05 | 0.00 |
| TMEM123  | ILMN_1724139 | NM_052932.2    | 1.66 | 2.35E-05 | 0.00 |
| CFD      | ILMN_1777190 | NM_001928.2    | 1.66 | 1.65E-03 | 0.00 |
| ARL4A    | ILMN_1775405 | NM_005738.3    | 1.65 | 5.98E-04 | 0.00 |
| HIST3H2A | ILMN_1779648 | NM_033445.2    | 1.65 | 3.04E-06 | 0.00 |
| JUP      | ILMN_1741970 | NM_002230.1    | 1.65 | 1.03E-03 | 0.00 |
| DRAP1    | ILMN_2112301 | NM_006442.2    | 1.65 | 7.02E-07 | 0.00 |
| SDSL     | ILMN_1750674 | NM_138432.2    | 1.64 | 1.42E-03 | 0.00 |
| FPR2     | ILMN_2392569 | NM_001462.3    | 1.64 | 9.61E-04 | 0.00 |
| SHISA5   | ILMN_2139100 | NM_016479.3    | 1.64 | 3.58E-07 | 0.00 |
| DTX3L    | ILMN_1784380 | NM_138287.2    | 1.64 | 6.90E-05 | 0.00 |
| ACTA2    | ILMN_1671703 | NM_001613.1    | 1.63 | 1.96E-02 | 0.61 |
| MERTK    | ILMN_2138589 | NM_006343.2    | 1.62 | 2.16E-04 | 0.00 |
| CYSLTR1  | ILMN_1733276 | NM_006639.2    | 1.62 | 3.53E-05 | 0.00 |
| GRN      | ILMN_1811702 | NM_002087.2    | 1.62 | 9.47E-06 | 0.00 |
| TYMS     | ILMN_1806040 | NM_001071.1    | 1.62 | 6.56E-04 | 0.00 |
| PARP10   | ILMN_1710844 | XM_001127571.1 | 1.62 | 3.27E-05 | 0.00 |
| PARP14   | ILMN_1691731 | NM_017554.1    | 1.62 | 2.40E-03 | 0.00 |

|            |              |                |      |          |      |
|------------|--------------|----------------|------|----------|------|
| BPGM       | ILMN_2352921 | NM_001724.3    | 1.61 | 2.50E-02 | 0.98 |
| HIST1H2BD  | ILMN_1651496 | NM_138720.1    | 1.61 | 1.25E-02 | 0.41 |
| LILRA5     | ILMN_1726545 | NM_181879.1    | 1.61 | 2.55E-03 | 0.00 |
| HBZ        | ILMN_1713458 | NM_005332.2    | 1.61 | 6.49E-03 | 0.98 |
| UBE2L6     | ILMN_1703108 | NM_004223.3    | 1.61 | 5.18E-06 | 0.00 |
| GPBAR1     | ILMN_1727709 | NM_170699.2    | 1.60 | 8.35E-04 | 0.00 |
| LILRA5     | ILMN_2357419 | NM_021250.2    | 1.60 | 1.28E-03 | 0.00 |
| ATF5       | ILMN_1669113 | NM_012068.3    | 1.60 | 3.90E-04 | 0.00 |
| GPBAR1     | ILMN_2316386 | NM_001077191.1 | 1.60 | 7.29E-04 | 0.00 |
| MOV10      | ILMN_1725700 | NM_020963.2    | 1.60 | 1.84E-04 | 0.00 |
| CYP2J2     | ILMN_1758731 | NM_000775.2    | 1.60 | 3.40E-05 | 0.00 |
| PI4K2B     | ILMN_1815134 | NM_018323.2    | 1.60 | 2.21E-06 | 0.00 |
| SP100      | ILMN_2284998 | NM_001080391.1 | 1.60 | 4.26E-07 | 0.00 |
| ZNFX1      | ILMN_1745148 | NM_021035.2    | 1.60 | 8.66E-05 | 0.00 |
| NMI        | ILMN_1739541 | NM_004688.1    | 1.59 | 2.35E-05 | 0.00 |
| SP110      | ILMN_1672661 | NM_004510.2    | 1.59 | 1.13E-05 | 0.00 |
| PTPRO      | ILMN_1720113 | NM_030667.1    | 1.59 | 1.53E-05 | 0.00 |
| MTE        | ILMN_2136089 | NM_175621.2    | 1.59 | 1.35E-05 | 0.00 |
| PARP10     | ILMN_2262044 | NM_032789.1    | 1.59 | 1.93E-04 | 0.00 |
| ATOX1      | ILMN_1670609 | NM_004045.3    | 1.59 | 1.26E-04 | 0.00 |
| PTPRO      | ILMN_2316878 | NM_030671.1    | 1.59 | 2.46E-03 | 0.00 |
| GNGT2      | ILMN_1671237 | NM_031498.1    | 1.58 | 3.40E-05 | 0.00 |
| HIST2H2AA3 | ILMN_2144426 | NM_003516.2    | 1.58 | 2.91E-03 | 0.00 |
| LDLR       | ILMN_2053415 | NM_000527.2    | 1.58 | 4.00E-03 | 0.00 |
| CLDN23     | ILMN_1725338 | NM_194284.2    | 1.58 | 1.49E-04 | 0.00 |
| FER1L3     | ILMN_2370976 | NM_013451.2    | 1.57 | 7.74E-03 | 0.21 |
| C9orf109   | ILMN_1695485 | XM_379665.2    | 1.57 | 1.11E-04 | 0.00 |
| CALML4     | ILMN_1757210 | NM_001031733.1 | 1.57 | 2.06E-04 | 0.00 |
| PHF11      | ILMN_1776723 | NM_001040443.1 | 1.57 | 4.76E-05 | 0.00 |
| LOC441019  | ILMN_1761281 | XM_498969.2    | 1.56 | 2.55E-05 | 0.00 |
| PARP10     | ILMN_1721411 | XM_001127571.1 | 1.56 | 1.44E-04 | 0.00 |
| TIMP1      | ILMN_1711566 | NM_003254.2    | 1.55 | 2.21E-06 | 0.00 |
| FER1L3     | ILMN_1810289 | NM_133337.1    | 1.55 | 4.66E-03 | 0.00 |
| SP100      | ILMN_2390586 | NM_001080391.1 | 1.55 | 6.82E-06 | 0.00 |
| FAM46A     | ILMN_1740466 | NM_017633.2    | 1.55 | 7.48E-04 | 0.00 |
| SP110      | ILMN_1813455 | NM_080424.1    | 1.55 | 3.01E-06 | 0.00 |
| HIST2H2AA3 | ILMN_1659047 | NM_003516.2    | 1.55 | 4.05E-03 | 0.00 |
| P2RY6      | ILMN_1660031 | NM_176796.1    | 1.55 | 4.08E-03 | 0.21 |
| CTSL1      | ILMN_1694757 | NM_001912.3    | 1.55 | 4.95E-06 | 0.00 |
| RIN2       | ILMN_1769546 | NM_018993.2    | 1.55 | 2.91E-04 | 0.00 |
| STAT2      | ILMN_1690921 | NM_005419.2    | 1.55 | 6.93E-04 | 0.00 |
| C19orf66   | ILMN_1750400 | NM_018381.2    | 1.54 | 1.73E-04 | 0.00 |
| BEX1       | ILMN_2234697 | NM_018476.3    | 1.54 | 4.77E-04 | 0.00 |
| TNFSF13B   | ILMN_2066858 | NM_006573.3    | 1.54 | 9.86E-05 | 0.00 |
| N4BP1      | ILMN_2201966 | NM_153029.3    | 1.53 | 3.80E-03 | 0.00 |
| DNASE2     | ILMN_1796245 | NM_001375.2    | 1.53 | 1.00E-04 | 0.00 |
| TRIM25     | ILMN_1813625 | NM_005082.4    | 1.53 | 1.25E-03 | 0.00 |
| CAMK1      | ILMN_2140990 | NM_003656.3    | 1.53 | 2.50E-04 | 0.00 |
| BATF2      | ILMN_1690241 | NM_138456.3    | 1.53 | 8.09E-04 | 0.00 |

|           |              |                |      |          |      |
|-----------|--------------|----------------|------|----------|------|
| GAS6      | ILMN_1779558 | NM_000820.1    | 1.53 | 9.66E-03 | 0.41 |
| GCH1      | ILMN_1812759 | NM_001024071.1 | 1.53 | 3.51E-03 | 0.00 |
| EPB41L3   | ILMN_2109197 | NM_012307.2    | 1.52 | 1.69E-03 | 0.00 |
| AK2       | ILMN_1716053 | NM_001625.2    | 1.52 | 8.06E-05 | 0.00 |
| IFIT5     | ILMN_1696654 | NM_012420.1    | 1.52 | 9.59E-04 | 0.00 |
| CLEC7A    | ILMN_1700610 | NM_197948.2    | 1.51 | 4.87E-04 | 0.00 |
| HIST2H2AC | ILMN_1768973 | NM_003517.2    | 1.51 | 3.03E-03 | 0.00 |
| ACOX2     | ILMN_1685703 | NM_003500.2    | 1.51 | 3.70E-04 | 0.00 |
| MRPS18C   | ILMN_1658416 | NM_016067.1    | 1.51 | 7.43E-06 | 0.00 |
| LAMP2     | ILMN_1673282 | NM_002294.1    | 1.51 | 1.60E-04 | 0.00 |
| KIAA0101  | ILMN_2285996 | NM_014736.4    | 1.51 | 1.24E-02 | 0.41 |
| OTOF      | ILMN_2340886 | NM_194322.1    | 1.50 | 4.06E-03 | 0.21 |
| PSMB9     | ILMN_2376108 | NM_002800.4    | 1.50 | 2.64E-04 | 0.00 |

**Down-regulated Genes**

| Symbol    | Probe ID     | Accession      | Fold change | p-value  | q-value (%) |
|-----------|--------------|----------------|-------------|----------|-------------|
| HDC       | ILMN_1792323 | NM_002112.2    | -3.95       | 3.40E-05 | 0.00        |
| LYPD2     | ILMN_1724266 | NM_205545.1    | -2.51       | 7.35E-03 | 0.42        |
| PPBP      | ILMN_1767281 | NM_002704.2    | -2.40       | 6.89E-03 | 0.22        |
| SH3BGRL2  | ILMN_1762764 | NM_031469.2    | -2.39       | 2.18E-02 | 0.98        |
| LOC651149 | ILMN_1660439 | XM_940278.1    | -2.39       | 5.21E-07 | 0.00        |
| MPL       | ILMN_1776640 | NM_005373.1    | -2.29       | 1.24E-02 | 0.61        |
| TXNDC12   | ILMN_1783753 | NM_015913.2    | -2.13       | 1.23E-11 | 0.00        |
| FCER1A    | ILMN_1688423 | NM_002001.2    | -2.08       | 4.02E-06 | 0.00        |
| LOC650557 | ILMN_1725170 | XM_942240.1    | -2.08       | 7.83E-04 | 0.00        |
| LOC643031 | ILMN_1743078 | XM_926402.1    | -2.06       | 2.11E-07 | 0.00        |
| RPS23     | ILMN_1772459 | NM_001025.4    | -1.98       | 4.56E-03 | 0.22        |
| FCRL2     | ILMN_1791329 | NM_030764.2    | -1.93       | 1.35E-03 | 0.00        |
| EIF4B     | ILMN_1655497 | NM_001417.4    | -1.91       | 8.98E-08 | 0.00        |
| CNTNAP2   | ILMN_1690223 | NM_014141.4    | -1.90       | 4.30E-03 | 0.22        |
| EIF3EIP   | ILMN_1762725 | NM_016091.2    | -1.90       | 5.15E-07 | 0.00        |
| TCL1A     | ILMN_1788841 | NM_001098725.1 | -1.88       | 6.45E-03 | 0.22        |
| LOC91561  | ILMN_1691053 | XM_934176.1    | -1.85       | 9.20E-08 | 0.00        |
| EEF1G     | ILMN_2262288 | NM_001404.4    | -1.85       | 1.26E-05 | 0.00        |
| CLECL1    | ILMN_1782729 | NM_172004.2    | -1.81       | 1.09E-02 | 0.42        |
|           | ILMN_1882953 | AL833240       | -1.81       | 2.93E-03 | 0.22        |
| VENTX     | ILMN_1782352 | NM_014468.2    | -1.80       | 3.54E-04 | 0.00        |
| EEF1D     | ILMN_2408039 | NM_032378.2    | -1.80       | 6.40E-06 | 0.00        |
| LTA4H     | ILMN_1690342 | NM_000895.1    | -1.79       | 3.12E-06 | 0.00        |
| LOC158345 | ILMN_1685538 | XR_017130.1    | -1.78       | 2.33E-06 | 0.00        |
| MEF2D     | ILMN_1763228 | NM_005920.2    | -1.78       | 1.42E-09 | 0.00        |
| C19orf33  | ILMN_1717793 | NM_033520.1    | -1.78       | 1.11E-02 | 0.61        |
| RPL4      | ILMN_1752285 | NM_000968.2    | -1.77       | 2.71E-07 | 0.00        |
|           | ILMN_1827736 | BC038512       | -1.77       | 4.68E-08 | 0.00        |
| LOC220433 | ILMN_1795243 | XM_941684.2    | -1.76       | 8.34E-05 | 0.00        |
| LOC641848 | ILMN_1679025 | XM_935588.1    | -1.75       | 1.21E-07 | 0.00        |
| EEF2      | ILMN_1738383 | NM_001961.3    | -1.74       | 2.44E-07 | 0.00        |
| LOC389787 | ILMN_1665823 | XM_497072.2    | -1.74       | 9.26E-07 | 0.00        |
| PROS1     | ILMN_1671928 | NM_000313.1    | -1.72       | 1.65E-02 | 0.98        |

|           |              |                |       |          |      |
|-----------|--------------|----------------|-------|----------|------|
| C5orf39   | ILMN_2098616 | NM_001014279.1 | -1.72 | 1.48E-07 | 0.00 |
| LOC642934 | ILMN_1653039 | XM_942991.2    | -1.71 | 1.66E-03 | 0.00 |
| NELL2     | ILMN_1725417 | NM_006159.1    | -1.71 | 6.76E-04 | 0.00 |
| CD1C      | ILMN_1654210 | NM_001765.2    | -1.70 | 2.30E-03 | 0.00 |
| JAM3      | ILMN_1769575 | NM_032801.3    | -1.70 | 2.09E-03 | 0.00 |
| RTN1      | ILMN_1756928 | NM_021136.2    | -1.69 | 4.59E-05 | 0.00 |
| CACNA2D3  | ILMN_1754076 | NM_018398.2    | -1.69 | 2.55E-05 | 0.00 |
| HNRPA1P4  | ILMN_1690586 | XM_939887.2    | -1.68 | 9.17E-07 | 0.00 |
| LOC388275 | ILMN_1676091 | XM_928429.1    | -1.68 | 1.20E-06 | 0.00 |
| HLA-DOA   | ILMN_1659075 | NM_002119.3    | -1.67 | 4.21E-04 | 0.00 |
| CLC       | ILMN_1654875 | NM_001828.4    | -1.67 | 1.21E-02 | 0.80 |
| PDXK      | ILMN_1672504 | NM_003681.4    | -1.67 | 6.95E-05 | 0.00 |
| LOC643977 | ILMN_1745599 | XM_932991.1    | -1.67 | 1.37E-05 | 0.00 |
| ZNF91     | ILMN_1802053 | NM_003430.2    | -1.66 | 1.10E-04 | 0.00 |
| LOC388532 | ILMN_1656292 | XM_939726.2    | -1.65 | 3.97E-08 | 0.00 |
| HNRPA1L-2 | ILMN_2220283 | NR_002944.2    | -1.64 | 1.13E-06 | 0.00 |
| LOC653820 | ILMN_1723433 | XM_935475.1    | -1.64 | 1.10E-02 | 0.61 |
| RGS2      | ILMN_2197365 | NM_002923.1    | -1.64 | 2.19E-02 | 0.98 |
| BANK1     | ILMN_1661646 | NM_001083907.1 | -1.63 | 1.26E-03 | 0.00 |
| RPL7      | ILMN_1815292 | NM_000971.3    | -1.63 | 1.96E-06 | 0.00 |
| CD19      | ILMN_1782704 | NM_001770.4    | -1.62 | 3.97E-03 | 0.22 |
| FAM101B   | ILMN_1714418 | NM_182705.2    | -1.62 | 2.69E-05 | 0.00 |
| RPL9      | ILMN_2408415 | NM_001024921.2 | -1.62 | 5.15E-06 | 0.00 |
| LOC647673 | ILMN_1757702 | XM_936731.1    | -1.62 | 1.24E-05 | 0.00 |
| GLS       | ILMN_2188722 | NM_014905.2    | -1.62 | 9.97E-06 | 0.00 |
| CLDND2    | ILMN_2077680 | NM_152353.1    | -1.62 | 3.33E-03 | 0.22 |
| OLIG1     | ILMN_1666089 | NM_138983.1    | -1.61 | 9.45E-03 | 0.42 |
| PARVB     | ILMN_1787919 | NM_013327.3    | -1.60 | 1.60E-02 | 0.80 |
| GOLGA8B   | ILMN_2103547 | NM_001023567.2 | -1.60 | 2.83E-03 | 0.00 |
| PABPC1    | ILMN_2136133 | NM_002568.3    | -1.59 | 3.73E-05 | 0.00 |
| AHNAK     | ILMN_1714567 | NM_001620.1    | -1.59 | 5.44E-04 | 0.00 |
| LOC645968 | ILMN_1695370 | XM_928934.1    | -1.59 | 2.48E-04 | 0.00 |
| LOC648343 | ILMN_1690295 | XR_018327.1    | -1.59 | 1.34E-06 | 0.00 |
| CMTM2     | ILMN_1799030 | NM_144673.2    | -1.59 | 1.25E-05 | 0.00 |
| RPS4X     | ILMN_2166831 | NM_001007.3    | -1.59 | 3.37E-04 | 0.00 |
| BLK       | ILMN_1668277 | NM_001715.2    | -1.58 | 2.32E-04 | 0.00 |
| EEF1D     | ILMN_1782543 | NM_032378.2    | -1.58 | 1.51E-06 | 0.00 |
| LAMA5     | ILMN_1773567 | NM_005560.3    | -1.57 | 7.77E-04 | 0.00 |
| EEF1B2    | ILMN_2318725 | NM_001037663.1 | -1.57 | 1.74E-08 | 0.00 |
| LOC643949 | ILMN_1692956 | XR_018645.1    | -1.57 | 3.37E-09 | 0.00 |
| PABPC4    | ILMN_1757343 | NM_003819.2    | -1.57 | 8.01E-07 | 0.00 |
| DSC1      | ILMN_2402640 | NM_004948.2    | -1.57 | 8.72E-04 | 0.00 |
| RPL10A    | ILMN_1808041 | NM_007104.4    | -1.57 | 8.99E-06 | 0.00 |
| EIF3F     | ILMN_1694398 | NM_003754.2    | -1.57 | 6.26E-08 | 0.00 |
| SYNE2     | ILMN_2391419 | NM_015180.4    | -1.57 | 5.45E-03 | 0.22 |
| LOC439992 | ILMN_1671045 | XM_495839.2    | -1.56 | 1.08E-04 | 0.00 |
| RPL3      | ILMN_2319994 | NM_001033853.1 | -1.56 | 1.30E-06 | 0.00 |
| EMR3      | ILMN_2348487 | NM_032571.2    | -1.56 | 2.40E-04 | 0.00 |
| RPLP1     | ILMN_1689725 | NM_001003.2    | -1.56 | 2.82E-05 | 0.00 |

|           |              |                |       |          |      |
|-----------|--------------|----------------|-------|----------|------|
|           | ILMN_1816342 | CR612552       | -1.56 | 1.37E-02 | 0.61 |
| C9orf45   | ILMN_1719998 | XR_017862.1    | -1.56 | 1.03E-04 | 0.00 |
| RPL22     | ILMN_2079386 | NM_000983.3    | -1.56 | 4.09E-06 | 0.00 |
| RPS4X     | ILMN_1810577 | NM_001007.3    | -1.55 | 4.68E-04 | 0.00 |
| FCRL3     | ILMN_1691693 | NM_001024667.1 | -1.55 | 2.45E-03 | 0.22 |
| VNN2      | ILMN_1758864 | NM_004665.2    | -1.55 | 9.48E-03 | 0.42 |
| RPL21     | ILMN_2290808 | NM_000982.3    | -1.55 | 4.14E-06 | 0.00 |
| ITGAE     | ILMN_1683927 | NM_002208.4    | -1.54 | 5.50E-09 | 0.00 |
| SORL1     | ILMN_1759818 | NM_003105.3    | -1.54 | 1.82E-03 | 0.00 |
| RPL5      | ILMN_2087080 | NM_000969.3    | -1.54 | 1.51E-07 | 0.00 |
| CYBRD1    | ILMN_1712305 | NM_024843.2    | -1.54 | 2.97E-03 | 0.22 |
| LOC388621 | ILMN_1677262 | XM_941195.2    | -1.54 | 1.45E-06 | 0.00 |
| VNN2      | ILMN_1678939 | NM_004665.2    | -1.53 | 4.10E-03 | 0.22 |
| HNRPDL    | ILMN_1653432 | NR_003249.1    | -1.53 | 2.63E-03 | 0.00 |
| NRG1      | ILMN_1737252 | NM_013962.2    | -1.53 | 6.00E-03 | 0.42 |
| ELA1      | ILMN_1805902 | NM_001971.4    | -1.53 | 2.65E-03 | 0.22 |
| BRI3BP    | ILMN_1693410 | XM_941876.1    | -1.53 | 3.71E-04 | 0.00 |
| FBL       | ILMN_1719205 | NM_001436.2    | -1.53 | 4.02E-06 | 0.00 |
| C11orf2   | ILMN_2077094 | NM_013265.2    | -1.53 | 6.99E-06 | 0.00 |
| CYBRD1    | ILMN_2087692 | NM_024843.2    | -1.53 | 6.15E-03 | 0.22 |
| MATK      | ILMN_1669321 | NM_139355.2    | -1.52 | 2.82E-04 | 0.00 |
| LOC654194 | ILMN_1755808 | XM_942669.1    | -1.52 | 1.30E-06 | 0.00 |
| GNG7      | ILMN_1728107 | NM_052847.2    | -1.52 | 8.99E-05 | 0.00 |
|           | ILMN_1898723 | BC090942       | -1.52 | 2.09E-05 | 0.00 |
| OSBPL10   | ILMN_1669497 | NM_017784.3    | -1.52 | 1.01E-03 | 0.00 |
| EEF1B2    | ILMN_1694587 | NM_001959.2    | -1.52 | 6.91E-06 | 0.00 |
| TCTN1     | ILMN_1685124 | NM_001082538.1 | -1.52 | 3.09E-04 | 0.00 |
| SORL1     | ILMN_2060115 | NM_003105.3    | -1.52 | 2.80E-03 | 0.00 |
| KRT10     | ILMN_1716093 | NM_000421.2    | -1.52 | 1.40E-04 | 0.00 |
| RAB37     | ILMN_2255579 | NM_175738.3    | -1.52 | 6.93E-05 | 0.00 |
| RPS29     | ILMN_2298818 | NM_001030001.1 | -1.51 | 6.54E-06 | 0.00 |
| NAP1L1    | ILMN_1699208 | NM_139207.1    | -1.51 | 4.58E-05 | 0.00 |
| LOC649095 | ILMN_1728645 | XM_001131851.1 | -1.51 | 4.53E-05 | 0.00 |
| GVIN1     | ILMN_1668526 | XM_495863.3    | -1.50 | 1.67E-02 | 0.80 |

**Supplemental Table 2.** Ingenuity canonical pathways analysis of genes differentially regulated by IFN-alpha.

| <u>Ingenuity Canonical Pathways</u>                                          | <u>P-value</u> | <u>Ratio</u> | <u>Molecules</u>                                                                                        |
|------------------------------------------------------------------------------|----------------|--------------|---------------------------------------------------------------------------------------------------------|
| Role of Pattern Recognition Receptors in Recognition of Bacteria and Viruses | 3.72E-10       | 1.51E-01     | OAS1, OAS2, C1QC, C1QA, C1QB, OAS3 (includes EG:4940), IFIH1, CLEC7A, IRF7, DDX58, TLR7, EIF2AK2, C3AR1 |
| Interferon Signaling                                                         | 2.19E-08       | 2.67E-01     | IFIT3, IFIT1, OAS1, IFITM1, MX1, IFI35, STAT2, STAT1                                                    |
| Activation of IRF by Cytosolic Pattern Recognition Receptors                 | 7.76E-08       | 1.35E-01     | DHX58, IFIH1, IRF7, DDX58, ZBP1, STAT2, STAT1, ADAR, IFIT2, ISG15                                       |
| Complement System                                                            | 1.15E-06       | 1.94E-01     | CFD, SERPING1, C1QC, C1QA, C1QB, C3AR1, C2                                                              |
| Retinoic acid Mediated Apoptosis Signaling                                   | 2.63E-04       | 1.14E-01     | PARP10, TNFSF10, PARP12, PARP9, PARP14                                                                  |
| Role of RIG1-like Receptors in Antiviral Innate Immunity                     | 7.76E-04       | 9.62E-02     | DHX58, IFIH1, IRF7, DDX58, TRIM25                                                                       |
| Dendritic Cell Maturation                                                    | 1.48E-02       | 4.02E-02     | HLA-DOA, STAT2, IL1F7, STAT1, CD1C, FCGR1A, FCGR1B                                                      |
| Oncostatin M Signaling                                                       | 1.86E-02       | 8.57E-02     | RRAS, MT2A, STAT1                                                                                       |
| Eicosanoid Signaling                                                         | 2.04E-02       | 4.76E-02     | GRN, LTA4H, FPR2, CYSLTR1                                                                               |
| Role of NFAT in Regulation of the Immune Response                            | 2.14E-02       | 3.59E-02     | HLA-DOA, RRAS, MEF2D, FCER1A, FCGR1A, GNG7, FCGR1B                                                      |
| Systemic Lupus Erythematosus Signaling                                       | 2.40E-02       | 3.97E-02     | RRAS, TLR7, IL1F7, FCGR1A, TNFSF13B, FCGR1B                                                             |
| Role of PKR in Interferon Induction and Antiviral Response                   | 2.82E-02       | 6.52E-02     | EIF2AK2, STAT1, FCGR1A                                                                                  |
| IL-17 Signaling                                                              | 3.16E-02       | 5.41E-02     | CXCL10, CCL2, RRAS, TIMP1                                                                               |
| Communication between Innate and Adaptive Immune Cells                       | 4.37E-02       | 4.44E-02     | CXCL10, TLR7, IL1F7, TNFSF13B                                                                           |
| Nitrogen Metabolism                                                          | 4.47E-02       | 2.26E-02     | VNN2, GLS, ADAR                                                                                         |
| Altered T Cell and B Cell Signaling in Rheumatoid Arthritis                  | 4.57E-02       | 4.6E-02      | HLA-DOA, TLR7, IL1F7, TNFSF13B                                                                          |
| EIF2 Signaling                                                               | 4.90E-02       | 4E-02        | PABPC1, RRAS, EIF3F, EIF2AK2                                                                            |

**Supplemental Table 3.** Gene transcripts up- and down-regulated by 50% ( $\geq 1.5$  fold) in IFN-alpha-treated subjects (n=11) compared to control (n=10), and in subjects with high (n=4) versus low (n=7) MADRS and MFI scores at 12 weeks IFN-alpha.

| IFN-alpha vs. Control |               |             | High vs. Low MADRS/MFI |               |             |
|-----------------------|---------------|-------------|------------------------|---------------|-------------|
| <i>Up-regulated</i>   |               |             | <i>Up-Regulated</i>    |               |             |
| <u>Probe ID</u>       | <u>Symbol</u> | <u>Fold</u> | <u>Probe ID</u>        | <u>Symbol</u> | <u>Fold</u> |
| ILMN_2058782          | IFI27         | 173.71      | ILMN_1796678           | HBG1          | 3.76        |
| ILMN_1663347          | OTOF          | 25.08       | ILMN_2084825           | HBG2          | 3.43        |
| ILMN_1815527          | HBD           | 13.12       | ILMN_1791534           | LOC731682     | 2.98        |
| ILMN_2367126          | ALAS2         | 11.96       | ILMN_1759155           | IFIT1L        | 2.45        |
| ILMN_1796678          | HBG1          | 11.34       | ILMN_2165753           | HLA-A29.1     | 2.22        |
| ILMN_2084825          | HBG2          | 11.24       | ILMN_1664464           | PTGDS         | 2.18        |
| ILMN_1707695          | IFIT1         | 10.76       | ILMN_1678238           | ZNF683        | 2.13        |
| ILMN_1696512          | ERAF          | 10.38       | ILMN_1731233           | GZMH          | 2.10        |
| ILMN_1723912          | IFI44L        | 10.31       | ILMN_2074762           | FCRL6         | 2.08        |
| ILMN_2239754          | IFIT3         | 8.53        | ILMN_1658399           | KLRG1         | 2.05        |
| ILMN_1701789          | IFIT3         | 7.96        | ILMN_1676575           | IKZF1         | 2.04        |
| ILMN_2347798          | IFI6          | 7.90        | ILMN_2336609           | SYTL2         | 1.96        |
| ILMN_1657871          | RSAD2         | 6.91        | ILMN_1663347           | OTOF          | 1.92        |
| ILMN_1805750          | IFITM3        | 6.64        | ILMN_1697377           | LOC649841     | 1.89        |
| ILMN_1652431          | CA1           | 6.15        | ILMN_1813191           | LOC653080     | 1.87        |
| ILMN_1720048          | CCL2          | 5.74        | ILMN_2189406           | C15orf38      | 1.86        |
| ILMN_1659688          | LGALS3BP      | 5.56        | ILMN_1784287           | TGFBR3        | 1.83        |
| ILMN_2054019          | ISG15         | 5.00        | ILMN_1791511           | TMEM176A      | 1.83        |
| ILMN_1664543          | IFIT3         | 4.98        | ILMN_2384122           | GPR56         | 1.83        |
| ILMN_1729749          | HERC5         | 4.87        | ILMN_2198408           | MFF           | 1.80        |
| ILMN_2091454          | HBM           | 4.80        | ILMN_1801216           | S100P         | 1.79        |
| ILMN_1760062          | IFI44         | 4.77        | ILMN_1761945           | FGFBP2        | 1.78        |
| ILMN_1662358          | MX1           | 4.74        | ILMN_2248970           | OAS2          | 1.77        |
| ILMN_1674811          | OASL          | 4.66        | ILMN_1768482           | CD8A          | 1.74        |
| ILMN_1739428          | IFIT2         | 4.52        | ILMN_1764573           | XIST          | 1.72        |
| ILMN_1742929          | HESX1         | 4.52        | ILMN_1651403           | LOC642161     | 1.71        |
| ILMN_1745397          | OAS3          | 4.49        | ILMN_1813338           | LAG3          | 1.70        |
| ILMN_1796409          | C1QB          | 4.42        | ILMN_2352097           | GPR56         | 1.68        |
| ILMN_2388547          | EPSTI1        | 4.40        | ILMN_2353732           | CD8A          | 1.66        |
| ILMN_1683678          | LOC26010      | 4.27        | ILMN_2109489           | GZMB          | 1.66        |
| ILMN_1695404          | LY6E          | 4.10        | ILMN_2399463           | VAV3          | 1.66        |
| ILMN_1835092          |               | 4.04        | ILMN_1660343           | LOC653080     | 1.65        |
| ILMN_1654639          | HERC6         | 4.04        | ILMN_1701195           | PLA2G7        | 1.64        |
| ILMN_2410826          | OAS1          | 4.03        | ILMN_2054019           | ISG15         | 1.63        |
| ILMN_2231928          | MX2           | 3.81        | ILMN_1695187           | GYPE          | 1.62        |
| ILMN_1742618          | XAF1          | 3.71        | ILMN_2313901           | PAM           | 1.61        |
| ILMN_1783621          | CMPK2         | 3.71        | ILMN_1740633           | PRF1          | 1.61        |
| ILMN_1674063          | OAS2          | 3.70        | ILMN_1682929           | SYTL2         | 1.61        |
| ILMN_1675640          | OAS1          | 3.60        | ILMN_1682993           | NKG7          | 1.59        |
| ILMN_1736729          | OAS2          | 3.54        | ILMN_1723944           | TARP          | 1.59        |
| ILMN_1686573          | DEFB1         | 3.52        | ILMN_2246083           | C7orf28B      | 1.58        |
| ILMN_1681721          | OASL          | 3.49        | ILMN_2370573           | XAF1          | 1.58        |
| ILMN_2127842          | HBA2          | 3.40        | ILMN_2073184           | S1PR5         | 1.58        |

|              |          |      |              |                       |       |
|--------------|----------|------|--------------|-----------------------|-------|
| ILMN_1658247 | OAS1     | 3.31 | ILMN_1679826 | CST7                  | 1.57  |
| ILMN_1733811 | JUP      | 3.27 | ILMN_2359945 | CES1                  | 1.56  |
| ILMN_2370573 | XAF1     | 3.27 | ILMN_1728298 | SBK1                  | 1.56  |
| ILMN_1798181 | IRF7     | 3.26 | ILMN_1773352 | CCL5                  | 1.55  |
| ILMN_1785902 | C1QC     | 3.26 | ILMN_1765109 | TNFRSF25              | 1.55  |
| ILMN_1725320 | SIGLEC1  | 3.25 | ILMN_1797988 | KLRD1                 | 1.54  |
| ILMN_2349061 | IRF7     | 3.25 | ILMN_1822671 | ??                    | 1.54  |
| ILMN_1759155 | IFIT1L   | 3.20 | ILMN_1913060 | ??                    | 1.54  |
| ILMN_1772964 | CCL8     | 3.16 | ILMN_1719975 | HOXC4                 | 1.53  |
| ILMN_1673352 | IFITM2   | 3.14 | ILMN_1799467 | SAMD9L                | 1.53  |
| ILMN_1670305 | SERPING1 | 3.07 | ILMN_2258816 | SAMD3                 | 1.52  |
| ILMN_1731224 | PARP9    | 3.06 | ILMN_1811301 | INPP5E                | 1.52  |
| ILMN_1795181 | DDX60    | 3.04 | ILMN_1652431 | CA1                   | 1.51  |
| ILMN_2374036 | CTSL1    | 3.01 | ILMN_1658247 | OAS1                  | 1.51  |
| ILMN_1812995 | CTSL1    | 3.00 | ILMN_1676099 | SPON2                 | 1.51  |
| ILMN_1653466 | HES4     | 3.00 | ILMN_1779071 | FEZ1                  | 1.50  |
| ILMN_1730628 | RNASE2   | 2.99 | ILMN_1794863 | CAMK2N1               | 1.50  |
| ILMN_1706502 | EIF2AK2  | 2.98 |              | <b>Down-Regulated</b> |       |
| ILMN_2364521 | AXL      | 2.95 | ILMN_1691846 | G0S2                  | -2.59 |
| ILMN_1787509 | PRIC285  | 2.93 | ILMN_1762899 | EGR1                  | -2.52 |
| ILMN_1699331 | IFIT1    | 2.91 | ILMN_1716733 | MYOM2                 | -2.29 |
| ILMN_2170814 | LAMP3    | 2.90 | ILMN_1742025 | OLFM1                 | -2.15 |
| ILMN_1745242 | PLSCR1   | 2.89 | ILMN_1745522 | PF4V1                 | -2.10 |
| ILMN_1910908 | ?        | 2.88 | ILMN_2404850 | RPL14                 | -2.10 |
| ILMN_1684255 | MYL4     | 2.87 | ILMN_2389590 | PRKAR1A               | -2.07 |
| ILMN_1781373 | IFIH1    | 2.82 | ILMN_1708303 | CYP4F22               | -2.02 |
| ILMN_1701877 | AXL      | 2.82 | ILMN_1718128 | PABPC3                | -2.02 |
| ILMN_1745374 | IFI35    | 2.76 | ILMN_1775501 | IL1B                  | -1.98 |
| ILMN_1686664 | MT2A     | 2.68 | ILMN_1688423 | FCER1A                | -1.97 |
| ILMN_1783276 | NEXN     | 2.66 | ILMN_2109416 | NAPSB                 | -1.96 |
| ILMN_1740572 | TCN2     | 2.63 | ILMN_1743199 | EGR2                  | -1.94 |
| ILMN_1709333 | OAS2     | 2.61 | ILMN_1723043 | NAPSB                 | -1.94 |
| ILMN_1654398 | RGL1     | 2.60 | ILMN_1782419 | GNG11                 | -1.89 |
| ILMN_1674985 | TMEM51   | 2.56 | ILMN_1867138 | ?                     | -1.89 |
| ILMN_1799467 | SAMD9L   | 2.53 | ILMN_1789627 | ?                     | -1.88 |
| ILMN_2261600 | FCGR1B   | 2.53 | ILMN_2132599 | ANKRD22               | -1.86 |
| ILMN_1814397 | EPB42    | 2.52 | ILMN_1810191 | PLA2G4C               | -1.83 |
| ILMN_1680192 | APOBEC3A | 2.52 | ILMN_1687384 | IFI6                  | -1.83 |
| ILMN_1765994 | ZBP1     | 2.51 | ILMN_2066060 | HLA-DRB6              | -1.81 |
| ILMN_1691507 | IL8RBP   | 2.51 | ILMN_1728478 | CXCL16                | -1.80 |
| ILMN_1690365 | USP41    | 2.50 | ILMN_2359742 | CTSB                  | -1.77 |
| ILMN_1801246 | IFITM1   | 2.47 | ILMN_1784040 | NAPSA                 | -1.77 |
| ILMN_2132599 | ANKRD22  | 2.46 | ILMN_2127842 | HBA2                  | -1.77 |
| ILMN_1695187 | GYPE     | 2.45 | ILMN_1799848 | ANKRD22               | -1.75 |
| ILMN_2119297 | SAMD4A   | 2.45 | ILMN_1723115 | CLEC4F                | -1.74 |
| ILMN_1731044 | KCTD14   | 2.42 | ILMN_2334242 | CREB1                 | -1.74 |
| ILMN_1697710 | IL1F7    | 2.41 | ILMN_2415303 | CLEC10A               | -1.72 |
| ILMN_1678422 | DHX58    | 2.41 | ILMN_1780582 | CD83                  | -1.71 |
| ILMN_1729487 | GMPR     | 2.38 | ILMN_2405628 | TOP1MT                | -1.71 |

|              |           |      |              |           |       |
|--------------|-----------|------|--------------|-----------|-------|
| ILMN_1757467 | H1F0      | 2.37 | ILMN_1680435 | NPEPPS    | -1.70 |
| ILMN_1797895 | FFAR2     | 2.36 | ILMN_1796508 | TOP1MT    | -1.69 |
| ILMN_1799848 | ANKRD22   | 2.35 | ILMN_2391861 | GSTM1     | -1.68 |
| ILMN_1791759 | CXCL10    | 2.34 | ILMN_2186061 | PFKFB3    | -1.68 |
| ILMN_1667796 | HBA2      | 2.34 | ILMN_2383306 | GPATCH4   | -1.65 |
| ILMN_1814305 | SAMD9     | 2.31 | ILMN_1705686 | NRGN      | -1.65 |
| ILMN_1701621 | SCO2      | 2.30 | ILMN_1798177 | CHURC1    | -1.64 |
| ILMN_1690105 | STAT1     | 2.29 | ILMN_1717163 | F13A1     | -1.64 |
| ILMN_1687384 | IFI6      | 2.28 | ILMN_1659365 | LOC653071 | -1.64 |
| ILMN_1777233 | E2F2      | 2.27 | ILMN_1661577 | MAFA      | -1.64 |
| ILMN_1691364 | STAT1     | 2.25 | ILMN_1716195 | HIST1H2BG | -1.63 |
| ILMN_1801616 | EMP1      | 2.25 | ILMN_2336781 | SOD2      | -1.63 |
| ILMN_1751120 | HIST1H4H  | 2.22 | ILMN_1749070 | HLA-DPB1  | -1.62 |
| ILMN_1678833 | CCR1      | 2.22 | ILMN_1707137 | C17orf97  | -1.62 |
| ILMN_1740200 | LOC728216 | 2.22 | ILMN_1674228 | LOC651751 | -1.62 |
| ILMN_1690939 | ECGF1     | 2.19 | ILMN_1804601 | LOC649923 | -1.59 |
| ILMN_2100437 | HBB       | 2.18 | ILMN_1696360 | CTSB      | -1.59 |
| ILMN_1701114 | GBP1      | 2.17 | ILMN_2399363 | CLEC4A    | -1.59 |
| ILMN_1709747 | ENDOGL1   | 2.16 | ILMN_1659490 | LOC653158 | -1.59 |
| ILMN_2412214 | LGALS9    | 2.15 | ILMN_2411127 | C21orf57  | -1.58 |
| ILMN_2248970 | OAS2      | 2.14 | ILMN_2293374 | TOP1MT    | -1.57 |
| ILMN_1801307 | TNFSF10   | 2.14 | ILMN_1733998 | DHRS9     | -1.57 |
| ILMN_1653026 | PLAC8     | 2.13 | ILMN_2201580 | GSTM2     | -1.57 |
| ILMN_1718558 | PARP12    | 2.13 | ILMN_1751607 | FOSB      | -1.56 |
| ILMN_1691436 | BLVRA     | 2.11 | ILMN_1783142 | RPS4Y1    | -1.56 |
| ILMN_1691156 | MT1A      | 2.11 | ILMN_1672605 | C7orf41   | -1.56 |
| ILMN_2173975 | RTP4      | 2.09 | ILMN_1778136 | ZMYND15   | -1.56 |
| ILMN_1786303 | LILRA3    | 2.08 | ILMN_2328666 | CD83      | -1.54 |
| ILMN_1788017 | HSH2D     | 2.07 | ILMN_1728106 | TNF       | -1.54 |
| ILMN_1772809 | SLC4A1    | 2.07 | ILMN_1772218 | HLA-DPA1  | -1.54 |
| ILMN_2053527 | PARP9     | 2.07 | ILMN_1671891 | PID1      | -1.53 |
| ILMN_1777325 | STAT1     | 2.04 | ILMN_2406501 | SOD2      | -1.53 |
| ILMN_1766165 | SNCA      | 2.01 | ILMN_1758529 | P2RX1     | -1.53 |
| ILMN_2148785 | GBP1      | 2.01 | ILMN_1687306 | LGALS2    | -1.52 |
| ILMN_1779252 | TRIM22    | 2.01 | ILMN_1715991 | SDPR      | -1.52 |
| ILMN_1787529 | C3AR1     | 2.01 | ILMN_1727271 | WARS      | -1.51 |
| ILMN_1701933 | SNCA      | 2.00 | ILMN_1661266 | HLA-DQB1  | -1.51 |
| ILMN_2289093 | KIAA1618  | 1.99 | ILMN_2339835 | PTGS1     | -1.50 |
| ILMN_2333670 | RNASE1    | 1.99 | ILMN_1699071 | C21orf7   | -1.50 |
| ILMN_2093343 | PLAC8     | 1.98 | ILMN_2413331 | TMEM107   | -1.50 |
| ILMN_1769734 | NT5C3     | 1.98 |              |           |       |
| ILMN_2113126 | RNASE3    | 1.98 |              |           |       |
| ILMN_2370336 | MS4A4A    | 1.96 |              |           |       |
| ILMN_1683792 | LAP3      | 1.95 |              |           |       |
| ILMN_2233783 | CD38      | 1.95 |              |           |       |
| ILMN_1687768 | NCOA7     | 1.94 |              |           |       |
| ILMN_2415144 | SP110     | 1.93 |              |           |       |
| ILMN_1701455 | FBXO6     | 1.93 |              |           |       |
| ILMN_2176063 | FCGR1A    | 1.93 |              |           |       |

|              |           |      |
|--------------|-----------|------|
| ILMN_1797001 | DDX58     | 1.93 |
| ILMN_2391051 | FCGR1B    | 1.92 |
| ILMN_1715760 | LGALS9    | 1.92 |
| ILMN_1807042 | MARCKS    | 1.90 |
| ILMN_1732534 | CHMP5     | 1.90 |
| ILMN_1731418 | SP110     | 1.88 |
| ILMN_2105441 | IGJ       | 1.88 |
| ILMN_1680652 | SELENBP1  | 1.88 |
| ILMN_1661631 | LILRA3    | 1.88 |
| ILMN_2109708 | ECGF1     | 1.87 |
| ILMN_1704972 | TRIM5     | 1.87 |
| ILMN_1743911 | SLC25A39  | 1.87 |
| ILMN_2104830 | ACP2      | 1.87 |
| ILMN_1766184 | LOC654346 | 1.86 |
| ILMN_1793476 | PRKCDBP   | 1.86 |
| ILMN_1659913 | ISG20     | 1.86 |
| ILMN_1815895 | LOC649143 | 1.85 |
| ILMN_1731503 | MARCO     | 1.85 |
| ILMN_1710740 | C2        | 1.84 |
| ILMN_1780825 | RRAS      | 1.83 |
| ILMN_1737918 | C1QA      | 1.82 |
| ILMN_2094166 | CHMP5     | 1.80 |
| ILMN_1722158 | CASP5     | 1.80 |
| ILMN_1724333 | TOR1B     | 1.80 |
| ILMN_2320964 | ADAR      | 1.80 |
| ILMN_2173611 | MT1E      | 1.80 |
| ILMN_1677827 | TLR7      | 1.79 |
| ILMN_1661577 | MAFA      | 1.79 |
| ILMN_2355953 | LILRB4    | 1.77 |
| ILMN_1724250 | GRN       | 1.77 |
| ILMN_1713990 | TRIP6     | 1.76 |
| ILMN_2203271 | FPR3      | 1.76 |
| ILMN_1807277 | IFI30     | 1.76 |
| ILMN_1710937 | IFI16     | 1.76 |
| ILMN_1761566 | C5orf32   | 1.76 |
| ILMN_2352121 | NT5C3     | 1.75 |
| ILMN_2113333 | LGALS9B   | 1.75 |
| ILMN_1676575 | IKZF1     | 1.75 |
| ILMN_1672606 | OAS1      | 1.75 |
| ILMN_1791511 | TMEM176A  | 1.75 |
| ILMN_2070044 | PPM1K     | 1.75 |
| ILMN_1845037 | ?         | 1.74 |
| ILMN_1707137 | C17orf97  | 1.74 |
| ILMN_1705241 | TDRD7     | 1.74 |
| ILMN_1769520 | UBE2L6    | 1.74 |
| ILMN_2359945 | CES1      | 1.74 |
| ILMN_1758938 | SLC31A2   | 1.74 |
| ILMN_1764709 | MAFB      | 1.73 |
| ILMN_1758333 | HMG2L1    | 1.73 |

|              |           |      |
|--------------|-----------|------|
| ILMN_1711899 | ANXA2     | 1.72 |
| ILMN_1723480 | BST2      | 1.72 |
| ILMN_1749722 | RNF213    | 1.72 |
| ILMN_1758418 | TNFSF13B  | 1.71 |
| ILMN_1776777 | ADAR      | 1.70 |
| ILMN_1771385 | GBP4      | 1.69 |
| ILMN_1740875 | FPR2      | 1.69 |
| ILMN_1701386 | STRADB    | 1.69 |
| ILMN_1659960 | IL4I1     | 1.68 |
| ILMN_1695744 | LILRB2    | 1.67 |
| ILMN_2390162 | PHF11     | 1.67 |
| ILMN_1786328 | WDR40A    | 1.67 |
| ILMN_1652199 | LOC642113 | 1.66 |
| ILMN_1724139 | TMEM123   | 1.66 |
| ILMN_1777190 | CFD       | 1.66 |
| ILMN_1775405 | ARL4A     | 1.65 |
| ILMN_2150095 | CES4      | 1.65 |
| ILMN_1779648 | HIST3H2A  | 1.65 |
| ILMN_1741970 | JUP       | 1.65 |
| ILMN_2112301 | DRAP1     | 1.65 |
| ILMN_1750674 | SDSL      | 1.64 |
| ILMN_1696183 | HBQ1      | 1.64 |
| ILMN_2392569 | FPR2      | 1.64 |
| ILMN_2139100 | SHISA5    | 1.64 |
| ILMN_1784380 | DTX3L     | 1.64 |
| ILMN_1671703 | ACTA2     | 1.63 |
| ILMN_2138589 | MERTK     | 1.62 |
| ILMN_1733276 | CYSLTR1   | 1.62 |
| ILMN_1651358 | HBE1      | 1.62 |
| ILMN_1811702 | GRN       | 1.62 |
| ILMN_1806040 | TYMS      | 1.62 |
| ILMN_1710844 | PARP10    | 1.62 |
| ILMN_1691731 | PARP14    | 1.62 |
| ILMN_2352921 | BPGM      | 1.61 |
| ILMN_1651496 | HIST1H2BD | 1.61 |
| ILMN_1726545 | LILRA5    | 1.61 |
| ILMN_1723115 | CLEC4F    | 1.61 |
| ILMN_1713458 | HBZ       | 1.61 |
| ILMN_1703108 | UBE2L6    | 1.61 |
| ILMN_1791534 | LOC731682 | 1.61 |
| ILMN_1727709 | GPBAR1    | 1.60 |
| ILMN_2357419 | LILRA5    | 1.60 |
| ILMN_1669113 | ATF5      | 1.60 |
| ILMN_2316386 | GPBAR1    | 1.60 |
| ILMN_1809467 | VAMP5     | 1.60 |
| ILMN_1725700 | MOV10     | 1.60 |
| ILMN_1758731 | CYP2J2    | 1.60 |
| ILMN_1815134 | PI4K2B    | 1.60 |
| ILMN_2284998 | SP100     | 1.60 |

|              |            |      |
|--------------|------------|------|
| ILMN_1745148 | ZNFX1      | 1.60 |
| ILMN_1784602 | CDKN1A     | 1.59 |
| ILMN_1739541 | NMI        | 1.59 |
| ILMN_1672661 | SP110      | 1.59 |
| ILMN_1720113 | PTPRO      | 1.59 |
| ILMN_2136089 | MTE        | 1.59 |
| ILMN_2262044 | PARP10     | 1.59 |
| ILMN_1670609 | ATOX1      | 1.59 |
| ILMN_2316878 | PTPRO      | 1.59 |
| ILMN_1683093 | GYPB       | 1.59 |
| ILMN_1752592 | HLA-DRB4   | 1.58 |
| ILMN_1671237 | GNGT2      | 1.58 |
| ILMN_2144426 | HIST2H2AA3 | 1.58 |
| ILMN_1708323 | ALAS2      | 1.58 |
| ILMN_2053415 | LDLR       | 1.58 |
| ILMN_1725338 | CLDN23     | 1.58 |
| ILMN_2370976 | FER1L3     | 1.57 |
| ILMN_1708934 | ADM        | 1.57 |
| ILMN_1695485 | C9orf109   | 1.57 |
| ILMN_1757210 | CALML4     | 1.57 |
| ILMN_1776723 | PHF11      | 1.57 |
| ILMN_1675386 | CES1       | 1.56 |
| ILMN_1761281 | LOC441019  | 1.56 |
| ILMN_1721411 | PARP10     | 1.56 |
| ILMN_1715963 | FBXO7      | 1.55 |
| ILMN_1711566 | TIMP1      | 1.55 |
| ILMN_1810289 | FER1L3     | 1.55 |
| ILMN_2390586 | SP100      | 1.55 |
| ILMN_1740466 | FAM46A     | 1.55 |
| ILMN_1813455 | SP110      | 1.55 |
| ILMN_1659047 | HIST2H2AA3 | 1.55 |
| ILMN_1660031 | P2RY6      | 1.55 |
| ILMN_1694757 | CTSL1      | 1.55 |
| ILMN_1769546 | RIN2       | 1.55 |
| ILMN_1690921 | STAT2      | 1.55 |
| ILMN_1750400 | C19orf66   | 1.54 |
| ILMN_2109489 | GZMB       | 1.54 |
| ILMN_1680274 | LOC652694  | 1.54 |
| ILMN_2234697 | BEX1       | 1.54 |
| ILMN_2066858 | TNFSF13B   | 1.54 |
| ILMN_1674228 | LOC651751  | 1.54 |
| ILMN_2201966 | N4BP1      | 1.53 |
| ILMN_1796245 | DNASE2     | 1.53 |
| ILMN_1813625 | TRIM25     | 1.53 |
| ILMN_2140990 | CAMK1      | 1.53 |
| ILMN_1690241 | BATF2      | 1.53 |
| ILMN_1779558 | GAS6       | 1.53 |
| ILMN_1739508 | LOC652493  | 1.53 |
| ILMN_1812759 | GCH1       | 1.53 |

|              |           |      |
|--------------|-----------|------|
| ILMN_1749834 | LOC388588 | 1.52 |
| ILMN_2109197 | EPB41L3   | 1.52 |
| ILMN_1716053 | AK2       | 1.52 |
| ILMN_1696654 | IFIT5     | 1.52 |
| ILMN_1700610 | CLEC7A    | 1.51 |
| ILMN_2413537 | HEMGN     | 1.51 |
| ILMN_1768973 | HIST2H2AC | 1.51 |
| ILMN_1685703 | ACOX2     | 1.51 |
| ILMN_1658416 | MRPS18C   | 1.51 |
| ILMN_1673282 | LAMP2     | 1.51 |
| ILMN_2285996 | KIAA0101  | 1.51 |
| ILMN_2340886 | OTOF      | 1.50 |
| ILMN_2376108 | PSMB9     | 1.50 |

***Down-Regulated***

|              |           |       |
|--------------|-----------|-------|
| ILMN_1792323 | HDC       | -3.95 |
| ILMN_1715169 | HLA-DRB1  | -3.30 |
| ILMN_1671509 | CCL3      | -2.94 |
| ILMN_1697499 | HLA-DRB5  | -2.94 |
| ILMN_1666733 | IL8       | -2.87 |
| ILMN_1775501 | IL1B      | -2.74 |
| ILMN_2184373 | IL8       | -2.74 |
| ILMN_1682717 | IER3      | -2.67 |
| ILMN_1747355 | CCL3L1    | -2.64 |
| ILMN_1715991 | SDPR      | -2.62 |
| ILMN_1724266 | LYPD2     | -2.51 |
| ILMN_1767281 | PPBP      | -2.40 |
| ILMN_1762764 | SH3BGRL2  | -2.39 |
| ILMN_1660439 | LOC651149 | -2.39 |
| ILMN_1751814 | LOC645128 | -2.34 |
| ILMN_1782419 | GNG11     | -2.33 |
| ILMN_1743290 | GP9       | -2.31 |
| ILMN_1776640 | MPL       | -2.29 |
| ILMN_2105573 | CCL3L3    | -2.24 |
| ILMN_1710280 | TUBB1     | -2.21 |
| ILMN_2218856 | CCL3L1    | -2.18 |
| ILMN_1705686 | NRGN      | -2.17 |
| ILMN_1783753 | TXNDC12   | -2.13 |
| ILMN_2413331 | TMEM107   | -2.10 |
| ILMN_1688423 | FCER1A    | -2.08 |
| ILMN_1725170 | LOC650557 | -2.08 |
| ILMN_1705605 | MGC13005  | -2.07 |
| ILMN_1743078 | LOC643031 | -2.06 |
| ILMN_1672605 | C7orf41   | -2.05 |
| ILMN_1668374 | ITGB5     | -1.98 |
| ILMN_1772459 | RPS23     | -1.98 |
| ILMN_1699071 | C21orf7   | -1.97 |
| ILMN_2392189 | CTDSPL    | -1.94 |
| ILMN_1791329 | FCRL2     | -1.93 |
| ILMN_1691846 | G0S2      | -1.93 |

|              |           |       |
|--------------|-----------|-------|
| ILMN_1655497 | EIF4B     | -1.91 |
| ILMN_1690223 | CNTNAP2   | -1.90 |
| ILMN_1762725 | EIF3EIP   | -1.90 |
| ILMN_1822671 | ?         | -1.88 |
| ILMN_1788841 | TCL1A     | -1.88 |
| ILMN_1691053 | LOC91561  | -1.85 |
| ILMN_2262288 | EEF1G     | -1.85 |
| ILMN_2339835 | PTGS1     | -1.85 |
| ILMN_1782729 | CLECL1    | -1.81 |
| ILMN_1882953 | ?         | -1.81 |
| ILMN_1782352 | VENTX     | -1.80 |
| ILMN_2408039 | EEF1D     | -1.80 |
| ILMN_1690342 | LTA4H     | -1.79 |
| ILMN_1685538 | LOC158345 | -1.78 |
| ILMN_1763228 | MEF2D     | -1.78 |
| ILMN_1752755 | VWF       | -1.78 |
| ILMN_1717793 | C19orf33  | -1.78 |
| ILMN_1752285 | RPL4      | -1.77 |
| ILMN_1827736 | ?         | -1.77 |
| ILMN_1795243 | LOC220433 | -1.76 |
| ILMN_1808238 | RBPMS2    | -1.75 |
| ILMN_1676973 | CABP5     | -1.75 |
| ILMN_1744912 | CTTN      | -1.75 |
| ILMN_1679025 | LOC641848 | -1.75 |
| ILMN_1738383 | EEF2      | -1.74 |
| ILMN_1665823 | LOC389787 | -1.74 |
| ILMN_1810836 | PDE5A     | -1.73 |
| ILMN_2100209 | CCL4L1    | -1.73 |
| ILMN_1671928 | PROS1     | -1.72 |
| ILMN_2098616 | C5orf39   | -1.72 |
| ILMN_1653039 | LOC642934 | -1.71 |
| ILMN_1728197 | CLDN5     | -1.71 |
| ILMN_1789627 | ?         | -1.71 |
| ILMN_2054297 | PTGS2     | -1.71 |
| ILMN_1725417 | NELL2     | -1.71 |
| ILMN_1716276 | CCL4L2    | -1.70 |
| ILMN_1654210 | CD1C      | -1.70 |
| ILMN_1769575 | JAM3      | -1.70 |
| ILMN_1717163 | F13A1     | -1.70 |
| ILMN_1756928 | RTN1      | -1.69 |
| ILMN_1773245 | CCL3L1    | -1.69 |
| ILMN_1754076 | CACNA2D3  | -1.69 |
| ILMN_1690586 | HNRPA1P4  | -1.68 |
| ILMN_1676091 | LOC388275 | -1.68 |
| ILMN_1659075 | HLA-DOA   | -1.67 |
| ILMN_1654875 | CLC       | -1.67 |
| ILMN_1672504 | PDXK      | -1.67 |
| ILMN_1745599 | LOC643977 | -1.67 |
| ILMN_1802053 | ZNF91     | -1.66 |

|              |           |       |
|--------------|-----------|-------|
| ILMN_1739423 | RN7SK     | -1.65 |
| ILMN_1656292 | LOC388532 | -1.65 |
| ILMN_1729453 | TSPAN9    | -1.64 |
| ILMN_2069224 | PVALB     | -1.64 |
| ILMN_2220283 | HNRPA1L-2 | -1.64 |
| ILMN_1723433 | LOC653820 | -1.64 |
| ILMN_2197365 | RGS2      | -1.64 |
| ILMN_1776077 | SF1       | -1.63 |
| ILMN_1661646 | BANK1     | -1.63 |
| ILMN_1815292 | RPL7      | -1.63 |
| ILMN_1782704 | CD19      | -1.62 |
| ILMN_1714418 | FAM101B   | -1.62 |
| ILMN_2408415 | RPL9      | -1.62 |
| ILMN_1775373 | CMTM5     | -1.62 |
| ILMN_1757702 | LOC647673 | -1.62 |
| ILMN_1713731 | ALOX12    | -1.62 |
| ILMN_2188722 | GLS       | -1.62 |
| ILMN_1695812 | KRT72     | -1.62 |
| ILMN_2077680 | CLDND2    | -1.62 |
| ILMN_1768099 | SCGB1C1   | -1.61 |
| ILMN_1666089 | OLIG1     | -1.61 |
| ILMN_1702691 | TNFAIP3   | -1.61 |
| ILMN_1714848 | ZNF354A   | -1.61 |
| ILMN_1691264 | NAT8B     | -1.60 |
| ILMN_1787919 | PARVB     | -1.60 |
| ILMN_2103547 | GOLGA8B   | -1.60 |
| ILMN_2136133 | PABPC1    | -1.59 |
| ILMN_1714567 | AHNAK     | -1.59 |
| ILMN_1754249 | LOC442535 | -1.59 |
| ILMN_1695370 | LOC645968 | -1.59 |
| ILMN_1690295 | LOC648343 | -1.59 |
| ILMN_2091920 | PTCRA     | -1.59 |
| ILMN_1799030 | CMTM2     | -1.59 |
| ILMN_2166831 | RPS4X     | -1.59 |
| ILMN_1668277 | BLK       | -1.58 |
| ILMN_1782543 | EEF1D     | -1.58 |
| ILMN_1773567 | LAMA5     | -1.57 |
| ILMN_2318725 | EEF1B2    | -1.57 |
| ILMN_1692956 | LOC643949 | -1.57 |
| ILMN_1757343 | PABPC4    | -1.57 |
| ILMN_2402640 | DSC1      | -1.57 |
| ILMN_2090004 | AQP10     | -1.57 |
| ILMN_1808041 | RPL10A    | -1.57 |
| ILMN_1694398 | EIF3F     | -1.57 |
| ILMN_2391419 | SYNE2     | -1.57 |
| ILMN_1658399 | KLRG1     | -1.56 |
| ILMN_1671045 | LOC439992 | -1.56 |
| ILMN_2319994 | RPL3      | -1.56 |
| ILMN_2348487 | EMR3      | -1.56 |

|              |           |       |
|--------------|-----------|-------|
| ILMN_1689725 | RPLP1     | -1.56 |
| ILMN_1721888 | ITGA2B    | -1.56 |
| ILMN_1816342 | ?         | -1.56 |
| ILMN_1719998 | C9orf45   | -1.56 |
| ILMN_1678238 | ZNF683    | -1.56 |
| ILMN_2079386 | RPL22     | -1.56 |
| ILMN_2311166 | ITGB5     | -1.55 |
| ILMN_1810577 | RPS4X     | -1.55 |
| ILMN_1691693 | FCRL3     | -1.55 |
| ILMN_1758864 | VNN2      | -1.55 |
| ILMN_2290808 | RPL21     | -1.55 |
| ILMN_1683927 | ITGAE     | -1.54 |
| ILMN_1759818 | SORL1     | -1.54 |
| ILMN_1668092 | ESAM      | -1.54 |
| ILMN_2087080 | RPL5      | -1.54 |
| ILMN_1712305 | CYBRD1    | -1.54 |
| ILMN_1677262 | LOC388621 | -1.54 |
| ILMN_1749403 | TSPAN33   | -1.54 |
| ILMN_1708580 | PDZK1IP1  | -1.54 |
| ILMN_1678939 | VNN2      | -1.53 |
| ILMN_1653432 | HNRPDL    | -1.53 |
| ILMN_1737252 | NRG1      | -1.53 |
| ILMN_1805902 | ELA1      | -1.53 |
| ILMN_1693410 | BRI3BP    | -1.53 |
| ILMN_1719205 | FBL       | -1.53 |
| ILMN_2077094 | C11orf2   | -1.53 |
| ILMN_2087692 | CYBRD1    | -1.53 |
| ILMN_1669321 | MATK      | -1.52 |
| ILMN_1755808 | LOC654194 | -1.52 |
| ILMN_1728107 | GNG7      | -1.52 |
| ILMN_1898723 | ?         | -1.52 |
| ILMN_1669497 | OSBPL10   | -1.52 |
| ILMN_1694587 | EEF1B2    | -1.52 |
| ILMN_1685124 | TCTN1     | -1.52 |
| ILMN_1867138 | ?         | -1.52 |
| ILMN_2060115 | SORL1     | -1.52 |
| ILMN_1716093 | KRT10     | -1.52 |
| ILMN_2255579 | RAB37     | -1.52 |
| ILMN_2298818 | RPS29     | -1.51 |
| ILMN_1693428 | TNNC2     | -1.51 |
| ILMN_1784203 | ACRBP     | -1.51 |
| ILMN_1682636 | CXCL2     | -1.51 |
| ILMN_1699208 | NAP1L1    | -1.51 |
| ILMN_2198239 | HGD       | -1.51 |
| ILMN_1728645 | LOC649095 | -1.51 |
| ILMN_1668526 | GVIN1     | -1.50 |
| ILMN_1792689 | HIST1H2AC | -1.50 |
| ILMN_1680388 | FLJ45337  | -1.50 |
